# Supplementary material
Source: Springer Nature journal article supplement (https://authors.library.caltech.edu/94814/2/12861_2005_79_MOESM1_ESM.pdf)
Supplement: MOESM1 [file 12861_2005_79_MOESM1_ESM.pdf]

Supplementary Figure 1

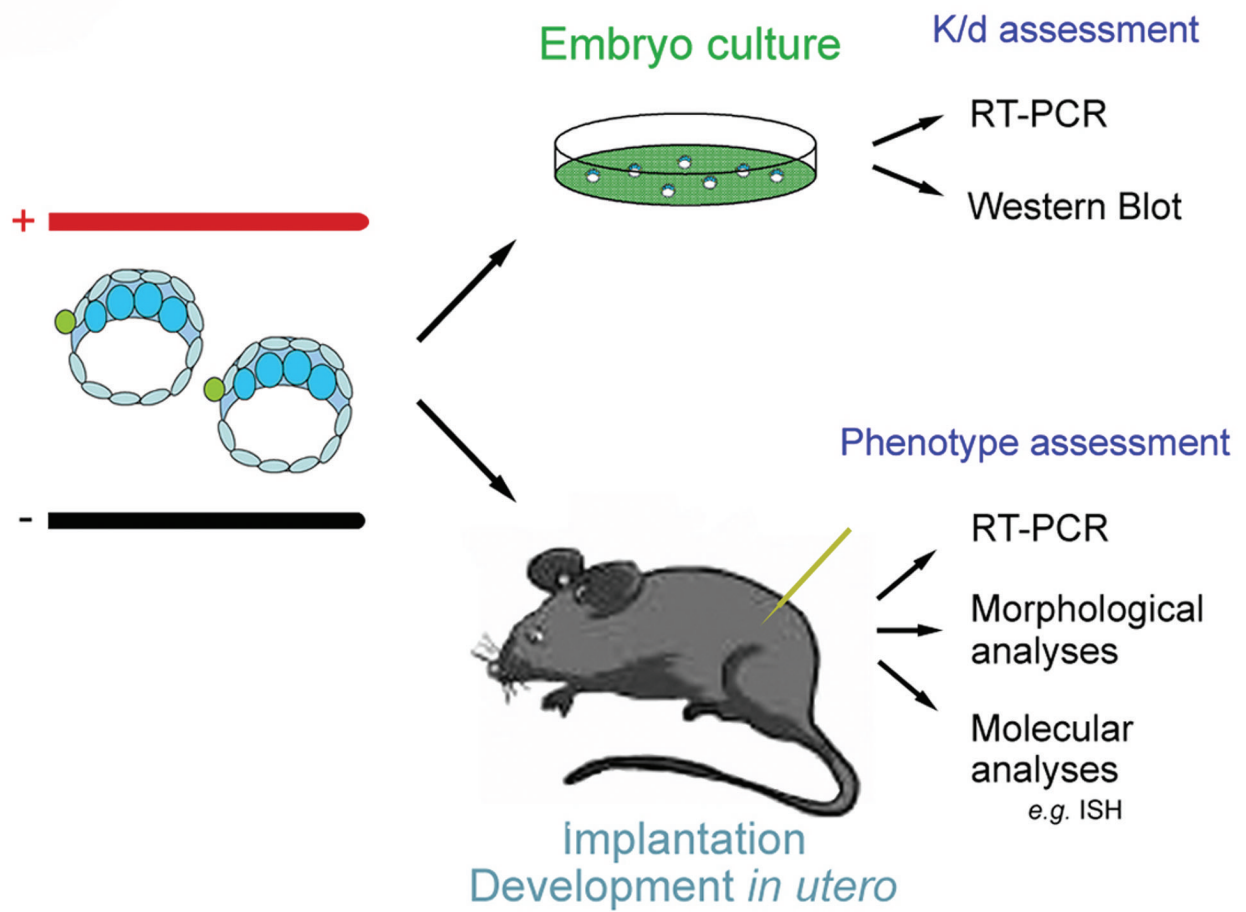

Method for RNAi in peri-implantation development

**Supplementary Table 1**

| Marker Gene  |                  |    |              |              |    |              |               |    |              |                |    |              |              |    |              |
|--------------|------------------|----|--------------|--------------|----|--------------|---------------|----|--------------|----------------|----|--------------|--------------|----|--------------|
| Emb Day      | <i>Brachyury</i> |    |              | <i>Eomes</i> |    |              | <i>Cer-1</i>  |    |              | <i>Lefty-1</i> |    |              | <i>Lhx1</i>  |    |              |
|              | Group 1          |    | Group 2      | Group 1      |    | Group 2      | Group 1       |    | Group 2      | Group 1        |    | Group 2      | Group 1      |    | Group 2      |
|              | MN               | DA | Df           | MN           | DA | Df           | MN            | DA | Df           | MN             | DA | Df           | MN           | DA | Df           |
| E6.5         | 6                | 2  | 2            | 5            | 0  | 2            | 6             | 3  | 2            | 1              | 2  | 2            | 2            | 1  | 1            |
| E7.5         | 7                | 1  | 3            | 4            | 0  | 3            | 3             | 4  | 3            | 1              | 2  | 4            | 1            | 2  | 2            |
| Totals       |                  |    |              |              |    |              |               |    |              |                |    |              |              |    |              |
| E6.5         | 8 / 15           |    | 2 / 2        | 5 / 9        |    | 2 / 2        | 9 / 16        |    | 2 / 2        | 3 / 6          |    | 2 / 2        | 3 / 5        |    | 1 / 1        |
| E7.5         | 8 / 16           |    | 3 / 3        | 4 / 7        |    | 3 / 3        | 7 / 15        |    | 3 / 3        | 3 / 5          |    | 4 / 4        | 3 / 6        |    | 2 / 2        |
| Total (%)    | 16 / 31 (52%)    |    | 5 / 5 (100%) | 9 / 16 (56%) |    | 5 / 5 (100%) | 16 / 31 (52%) |    | 5 / 5 (100%) | 6 / 11 (55%)   |    | 6 / 6 (100%) | 6 / 11 (55%) |    | 3 / 3 (100%) |
| E5.5 / E5.75 | n / a            |    |              | n / a        |    |              | SExp          | DR | Abs          | n / a          |    |              | n / a        |    |              |
| Total (%)    |                  |    |              |              |    |              | 13 / 16 (81%) |    |              |                |    |              |              |    |              |

Proportion of dsBmp4 RNA-electroporated embryos with defective expression of indicated marker genes.
